# Supplementary material for: Impact of Intermittent Fasting Combined With High-Intensity Interval Training on Body Composition, Metabolic Biomarkers, and Physical Fitness in Women With Obesity
Source: PubMed Central journal article supplement (PMC9178202; doi:10.3389/fnut.2022.884305), 2022-05-26
Supplement: Data_Sheet_1.pdf [file Data_Sheet_1.pdf]

## *Supplementary Material 1*

**Table 1:** Nutrient composition of two meals the intermittent fasting protocol.

|                  | <b>Meal 1</b>                 | <b>Meal 2</b>      |                    |
|------------------|-------------------------------|--------------------|--------------------|
| <b>Foods</b>     | Whole bread (50g)             | Whole pasta (110g) |                    |
|                  | Shredded chicken breast (60g) | Ground beef (75g)  |                    |
|                  | Tomato(24g)                   | Tomato sauce (75g) |                    |
|                  | Ricotta cheese (70g)          |                    |                    |
| <b>Nutrients</b> |                               |                    | <b>Daily total</b> |
| Energy (kcal)    | 326                           | 330                | 656                |
| Protein (g)      | 32,68 (40%)                   | 33,82 (40%)        | 66,50 (40%)        |
| Carbohydrate (g) | 28,37 (34%)                   | 34,98 (42%)        | 63,35 (38%)        |
| Fat (g)          | 9,44 (26%)                    | 6,76 (18%)         | 16,20 (22%)        |

**Note:** There were no restrictions on the consumption of green leafy salad.
