# Supplementary material for: Impact of Intermittent Fasting Combined With High-Intensity Interval Training on Body Composition, Metabolic Biomarkers, and Physical Fitness in Women With Obesity
Source: PubMed Central journal article supplement (PMC9178202; doi:10.3389/fnut.2022.884305), 2022-05-26

## CONSORT 2010 Flow Diagram

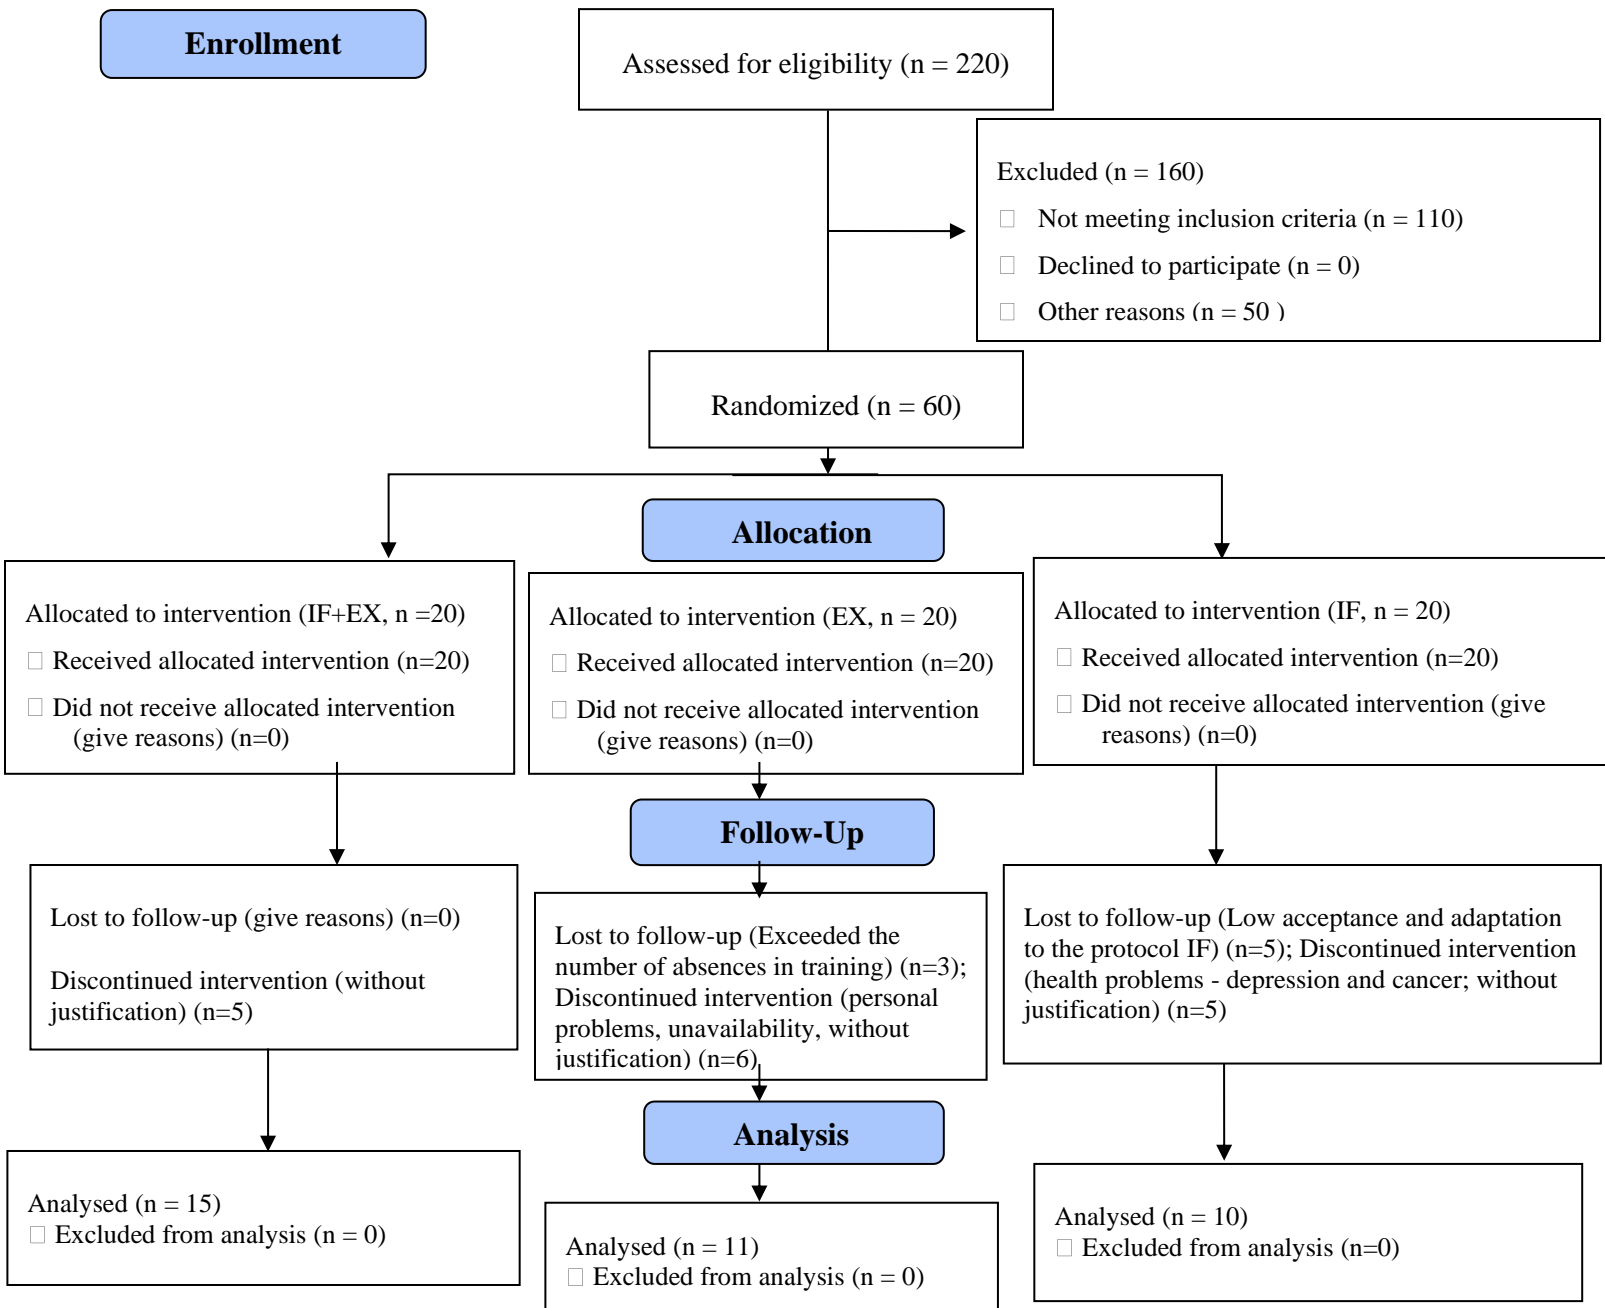

Supplement: Data_Sheet_2.pdf [file Data_Sheet_2.pdf]
